# Supplementary material for: Molecular epidemiology of carbapenem-resistant Escherichia coli in a tertiary hospital located in the Dabie Mountains region, China
Source: PeerJ. 2025 Oct 24;13:e20188. doi: 10.7717/peerj.20188 (PMC12558158; doi:10.7717/peerj.20188)
Supplement: Supplemental Information 2 [file peerj-13-20188-s002.xlsx]

## Sheet: Sheet1
Table S1. Background information of 33 carbapenem-resistant Escherichia coli isolates
Isolate	Year	Clinical characteristics										Assembly number	Carbapenemase inhibition test	Modified three-dimensional extract test	Acquired antimicrobial resistance genesa												Serotype	STs	Plasmid replicon													Minimum inhibitory concentration (mg/L)/Antimicrobial susceptibility
		Age	Gender	Ward	patients with underlying disease	Infection type	patients with invasive procedures	Previous hospitalization within 3 months	Prior surgery within 3 month	Specimen	Clinical outcomes				β-lactams	Aminoglycosides	Sulphonamides	Trimethoprims	QRDR MUTs	Quinolones	Tetracyclines	Macrolides	Lincosamides	Polymyxins	Rifamycin	Fosfomycins																aztreonam	amoxicillin/clavulanate	piracillin/tazobactam	cefuroxime	ceftazidime	ceftaxime	cefepime	cefoperazone/sulbactam
ECO01	2018	68	Male	Emergency department	Left lung occupying lesion, Hypertension	Acute diffuse peritonitis	Yes	No	No	Pus	Unsatisfactory treatment outcome	SAMN37576063	Class B Metallo-β-lactamase	negative	blaNDM-5, blaCTX-M-55, blaTEM-1B	aac(3)-IId, rmtB, aadA2, aadA5	sul1	dfrA12, dfrA17	parC		tet(B)	erm(B)	erm(B)				O102H6	405	IncFIA		IncFII	IncX4									Col(BS512)	>=64R	>=32R	>=128R	>=64R	>=64R	>=64R	>=32R	>=64R
ECO02	2019	55	Male	Infectious disease	High-level paraplegia	Rectal perianal infection	No	Yes	No	Pus	Cure	SAMN37576064		positive	blaNDM-5, blaCTX-M-15, blaOXA-1, blaCMY-2, blaTEM-1B	aac(3)-IId, aadA5	sul1	dfrA17	parC	qnrB7, aac(6')-Ib-cr	tet(B)						O8H9	692	IncFIA	IncFIB	IncFII	IncX3									Col(BS512), ColpEC648	>=64R	>=32R	>=128R	>=64R	>=64R	>=64R	>=32R	>=64R
ECO03	2019	52	Male	Hematology	Acute myeloid leukemia	Pneumonia, Septicemia	No	Yes	No	Blood	Cure	SAMN37576065		positive	blaNDM-5, blaCTX-M-15, blaOXA-1, blaCMY-2, blaTEM-1B	aac(3)-IId, aph(3'')-Ib, aph(6)-Id, aadA2, aadA5	sul1, sul2	dfrA12, dfrA17	parC	aac(6')-Ib-cr	tet(B)	mph(A)					H9	410	IncFIA	IncFIB	IncFII										Col(BS512)	>=64R	>=32R	>=128R	>=64R	>=64R	>=64R	>=32R	>=64R
ECO04	2019	70	Male	Urology surgery	Frequent urination	Urinary tract infection	Yes	Yes	No	Urine	Cure	SAMN37576066		negative	blaNDM-5, blaCTX-M-55, blaCTX-M-65, blaTEM-1B	aph(6)-Id, aph(3'')-Ib, aadA5, rmtB	sul1, sul2	dfrA17	parC		tet(A)	mph(A)				fosA3	O100H25	6388		IncFIB	IncFII	IncX3					IncY				Col440I	>=64R	>=32R	>=128R	>=64R	>=64R	>=64R	>=32R	>=64R
ECO05	2019	70	Male	Urology surgery	No significant medical history	Urinary tract infection	Yes	Yes	Yes	Urine	Cure	SAMN37576067		negative	blaNDM-5, blaCTX-M-15, blaOXA-1	aph(3'')-Ib, aac(6')-Ib-cr, aph(6)-Id, aadA2, aadA5	sul1, sul2	dfrA12, dfrA17	parC	aac(6')-Ib-cr	tet(B)	mph(A)					O101H10	617	IncFIA	IncFIB	IncFII										Col(BS512)	>=64R	>=32R	>=128R	>=64R	>=64R	>=64R	>=32R	>=64R
ECO06	2019	52	Female	Urology surgery	No significant medical history	Urinary tract infection	Yes	Yes	Yes	Urine	Cure	SAMN37576068		negative	blaNDM-5, blaCTX-M-65	aac(3)-IV, aph(3')-Ia, aph(4)-Ia, aadA2, aadA8b	sul2	dfrA12	parC		tet(B)						H25	156				IncX3										>=64R	>=32R	>=128R	>=64R	>=64R	>=64R	>=32R	>=64R
ECO07	2019	76	Male	ICU	Chronic lymphocytic leukemia, Hypertension	Pneumonia, Abdominal infection	Yes	No	No	Abdominal fluid	Given up	SAMN37576069	Class A Serine β-lactamase	negative	blaKPC-2, blaCTX-M-15, blaOXA-1, blaTEM-1B	aac(3)-IIa, aph(3'')-Ib, aph(6)-Id	sul2	dfrA14	parC	qnrB1	tet(A)						O86H6	662		IncFIB	IncFII								IncR		ColpEC648	>=64R	>=32R	>=128R	>=64R	>=64R	>=64R	16R	>=64R
ECO08	2019	67	Male	Oncology	Prostate cancer	Urinary tract infection	Yes	Yes	No	Urine	Given up	SAMN37576070	Class B Metallo-β-lactamase	positive	blaNDM-1, blaCMY-2, blaTEM-1B	aac(3)-IId, aph(3')-Ia, aadA1	sul2, sul3	dfrA12, dfrA14	parC	qnrS1	tet(A), tet(M)		lnu(F)				O11H25	457	IncFIA	IncFIB	IncFII							IncN				4S	>=32R	>=128R	>=64R	>=64R	>=64R	16R	>=64R
ECO09	2019	56	Female	Oncology	Bile duct cancer	Sepsis	No	No	No	Blood	Given up	SAMN37576071		negative	blaNDM-5	aph(3'')-Ib, aph(6)-Id	sul2		parC		tet(A)						O101H9	167				IncX3					IncY				Col156	2S	>=32R	>=128R	>=64R	>=64R	>=64R	16R	>=64R
ECO10	2019	56	Male	ICU	Non-Hodgkin's lymphoma	Urinary tract infection, Septic shock	Yes	No	No	Abdominal fluid	Given up	SAMN37576072		positive	blaNDM-5, blaCTX-M-14, blaCTX-M-55, blaCMY-2,	aac(3)-IV, aph(4)-Ia	sul2	dfrA17	parC		tet(A)					fosA3	O8H9	410	IncFIA	IncFIB	IncFII	IncX3,IncX4	IncB/O/K/Z	IncI1-I							Col(BS512),Col(MG828)	>=64R	>=32R	>=128R	>=64R	>=64R	>=64R	>=32R	>=64R
ECO11	2020	60	Male	ICU	Unknown medical history	Urinary tract infection, Pneumonia	Yes	N/A	N/A	Urine	Death	SAMN37576073		negative	blaNDM-5, blaCTX-M-55, blaTEM-1B, blaTEM-141, blaTEM-206	aph(3')-IIa, aph(3'')-Ib, aph(6)-Id			parC							fosA3	O101H9	2		IncFIB	IncFII	IncX3										>=64R	>=32R	>=128R	>=64R	>=64R	>=64R	>=32R	>=64R
ECO12	2020	76	Female	Surgery	Gastric cancer	Intra-abdominal infection, Bloodsream infection	Yes	Yes	No	Urine	Cure	SAMN37576074		negative	blaNDM-5, blaCTX-M-55, blaTEM-1B, blaTEM-141, blaTEM-206	aph(3')-IIa, aph(3'')-Ib, aac(3)-IId, aph(6)-Id, aadA5	sul1, sul2	dfrA17	parC		tet(A)	erm(B), mph(A)	erm(B)			fosA3	O101H17	2	IncFIA	IncFIB	IncFII	IncX3										>=64R	>=32R	>=128R	>=64R	>=64R	>=64R	>=32R	>=64R
ECO13	2020	73	Female	Burns and plastic surgery	Fracture of neck of femur, Diabetes mellitus, Dementia	Skin and soft tissue infection	Yes	No	No	Secretion	Cure	SAMN37576075		negative	blaNDM-5, blaCTX-M-55, blaTEM-1B	aac(3)-IIa, aph(3')-Ia, aadA1	sul3	dfrA14	parC								O76H45	19		IncFIB	IncFII	IncX3										>=64R	>=32R	>=128R	>=64R	>=64R	>=64R	>=32R	>=64R
ECO14	2020	65	Male	Surgery	Gastric cancer	Septic shock	Yes	Yes	No	Abdominal fluid	Cure	SAMN37576076		positive	blaNDM-5, blaCMY-2	aac(3)-IId, aph(3'')-Ib, aph(6)-Id	sul2		parC		tet(B)	mph(A)					O8H9	692	IncFIA	IncFIB	IncFII	IncX3			IncQ1						Col(BS512)	4S	>=32R	>=128R	>=64R	>=64R	>=64R	>=32R	>=64R
ECO15	2020	64	Male	Urology surgery	Hypertension	Urinary tract infection	No	No	No	Urine	Cure	SAMN37576077		negative	blaNDM-5, blaCTX-M-55, blaOXA-1		sul1, sul2			qnrS1, aac(6')-Ib-cr		mph(A)			ARR-3		O51H14	80		IncFIB					IncQ1	IncHI2	IncY					>=64R	>=32R	>=128R	>=64R	>=64R	>=64R	>=32R	>=64R
ECO16	2020	60	Male	Urology surgery	No significant medical history	Urinary tract infection	Yes	No	No	Urine	Cure	SAMN37576078		negative	blaNDM-5, blaCTX-M-55, blaTEM-1B, blaTEM-141, blaTEM-206	aph(3'')-Ib, aph(6)-Id, rmtB	sul2	dfrA14	parC		tet(A)					fosA3	0160H31	101	IncFIA	IncFIB	IncFII	IncX3									Col(MG828)	>=64R	>=32R	>=128R	>=64R	>=64R	>=64R	>=32R	>=64R
ECO17	2020	69	Male	Urology surgery	Carcinoma of bladder; Hypertension; Urothelial carcinoma	Urinary tract infection	Yes	Yes	Yes	Shunt fluid	Cure	SAMN37576079		negative	blaNDM-13, blaCTX-M-14, blaTEM-1B	aac(3)-IV, aph(4)-Ia, aadA1, aadA2	sul2, sul3	dfrA12	parC		tet(A)	mph(A)				fosA3	O8H9	1196		IncFIB	IncFII			IncI1-I					IncR		Col(BS512), Col156	2S	>=32R	>=128R	>=64R	>=64R	>=64R	>=32R	>=64R
ECO18	2020	70	Female	Infectious disease	Obsolete pulmonary tuberculosis	Urinary tract infection	No	No	No	Urine	Cure	SAMN37576080		negative	blaNDM-5, blaCTX-M-55, blaOXA-1, blaTEM-1B, blaLAP-2	aac(3)-IId, aph(3')-Ia, aph(3'')-Ib, aph(6)-Id, aadA22, armA	sul1, sul2, sul3	dfrA14	parC	qnrS1, aac(6')-Ib-cr	tet(A)	mph(E), msr(E)	lnu(F)	mcr-1.1	ARR-2, ARR-3, ARR-6	fosA3	O154H25	156				IncX3				IncHI2						16R	>=32R	>=128R	>=64R	>=64R	>=64R	>=32R	>=64R
ECO19	2020	66	Male	Urology surgery	Urothelial carcinoma	Urinary tract infection	Yes	Yes	Yes	Urine	Cure	SAMN37576081		negative	blaNDM-5, blaCTX-M-14, blaCTX-M-55, blaTEM-1B	aac(3)-IId, aph(3'')-Ib, aac(6')-Ib, aph(6)-Id, aac(6')-Ib-cr	sul2	dfrA17	parC	aac(6')-Ib-cr	tet(A)	erm(B), mph(A)	erm(B)				O101H9	167	IncFIA	IncFIB	IncFII	IncX3										>=64R	>=32R	>=128R	>=64R	>=64R	>=64R	>=32R	>=64R
ECO20	2020	17	Female	ICU	Motor neuron disease	Urinary tract infection, Pneumonia	Yes	No	No	Urine	Cure	SAMN37576082		negative	blaNDM-13, blaCTX-M-55	aph(3'')-Ib, aph(6)-Id	sul2	dfrA17	parC		tet(A)						O32H20	2179		IncFIB	IncFII			IncI1-I						p0111		>=64R	>=32R	>=128R	>=64R	>=64R	>=64R	>=32R	>=64R
ECO21	2020	79	Male	Burns and plastic surgery	No significant medical history	Skin and soft tissue infection	Yes	No	No	Secretion	Cure	SAMN37576083		negative	blaNDM-5, blaCTX-M-55	aph(3')-Ia, aadA1, aadA22	sul3	dfrA14	parC		tet(A)		lnu(F)				H9	471		IncFIB	IncFII	IncX3										>=64R	>=32R	>=128R	>=64R	>=64R	>=64R	>=32R	>=64R
ECO22	2020	49	Male	Urology surgery	Hypertension	Urinary tract infection, Bloodstream infection	Yes	No	No	Blood	Cure	SAMN37576084		negative	blaNDM-6, blaCTX-M65, blaTEM-1B	aac(3)-IId, aph(3'')-Ib, aadA2, rmtB	sul1, sul2	dfrA12	parC		tet(A)	mph(A)				fosA3	O9H30	361		IncFIB	IncFII											>=64R	>=32R	>=128R	>=64R	>=64R	>=64R	>=32R	>=64R
ECO23	2021	75	Male	Nephrology	Stage 5 chronic kidney disease, Hypertension, Diabetes mellitus	Pneumonia	Yes	No	No	Sputum	Given up	SAMN37576085		positive	blaNDM-5, blaOXA-1, blaCMY-2, blaTEM-1B	aac(3)-IId, aadA2, aadA5	sul1	dfrA12, dfrA17	parC	aac(6')-Ib-cr	tet(B)						O8H9	692	IncFIA	IncFIB	IncFII										Col(BS512)	8I	>=32R	>=128R	>=64R	>=64R	>=64R	>=32R	>=64R
ECO24	2021	90	Male	Gastroenterology	Pneumonia, Pleural effusion, Urinary tract infection, Sstroke, Gout, Anemia, Pericardial effusion, Adrenal insufficiency, Liver dysfunction	Urinary tract infection	No	No	No	Urine	Cure	SAMN37576086	Class A Serine β-lactamase	negative	blaKPC-2, blaCTX-M-14, blaCTX-M-17, blaCTX-M-24, blaCTX-M-27, blaCTX-M-104, blaCTX-M-125, blaCTX-M-130, blaCTX-M-196	aph(3'')-Ib, aph(6)-Id, aadA5	sul1, sul2	dfrA12, dfrA17	parC			erm(B)	erm(B)			fosA4	O25H4	131	IncFIA	IncFIB	IncFII	IncX1							IncR		Col156	16R	>=32R	>=128R	>=64R	>=64R	>=64R	>=32R	>=64R
ECO25	2021	56	Female	Nephrology	Chronic kidney disease, Heart failure, Diabetes mellitus, Cerebral infarction	Soft tissue infection	Yes	No	No	Secretion	Cure	SAMN37576087	Class B Metallo-β-lactamase	negative	blaNDM-5, blaTEM-1B	aadA1, aadA2	sul1, sul2, sul3	dfrA12	parC		tet(A)	mph(A)					O51H45	88	IncFIA	IncFIB	IncFII	IncX3						IncN3			Col(BS512), Col156, ColpEC648	<=1S	>=32R	>=128R	>=64R	>=64R	>=64R	16R	>=64R
ECO26	2021	66	Female	Nephrology	Acute lymphoblastic leukemia	Pneumonia	Yes	No	No	Secretion	Cure	SAMN37576088		negative	blaNDM-13, blaTEM-1B		sul3	dfrA14		qnrS1	tet(A)						O52H45	2064		IncFIB		IncX1	IncB/O/K/Z	IncI1-I	IncQ1						Col(BS512)	<=1S	>=32R	>=128R	>=64R	>=64R	>=64R	>=32R	>=64R
ECO27	2021	63	Male	Orthopedics	No significant medical history	Skin and soft tissue infection	Yes	Yes	Yes	Secretion	Cure	SAMN37576089		positive	blaNDM-5, blaCTX-M-55, blaCMY-2, blaTEM-1B, blaTEM-2, blaTEM-141, blaTEM-206	aph(3'')-Ib, aph(6)-Id	sul2	dfrA14	parC	OqxA, OqxB		mph(A)				fosA3	O8H9	410		IncFIB	IncFII	IncX3			IncQ1						Col(BS512)	>=64R	>=32R	>=128R	>=64R	>=64R	>=64R	>=32R	>=64R
ECO28	2021	45	Male	Emergency department	Duodenal tumor, Secondary malignant liver tumor	Abdominal infection, Septic shock	Yes	Yes	Yes	Bile	Given up	SAMN37576090	Carbapenemase Not Detected	negative	blaCTX-M-55, blaTEM-1B, blaTEM-141, blaTEM-206	aac(3)-IId, aph(3'')-Ib, aph(6)-Id, aadA2	sul2	dfrA12, dfrA14	parC		tet(A)	mph(A)				fosA3	H5	206		IncFIB	IncFII											>=64R	>=32R	>=128R	>=64R	>=64R	>=64R	>=32R	>=64R
ECO29	2021	54	Male	Surgery	No significant medical history	Pneumonia	Yes	No	No	Sputum	Given up	SAMN37576091	Class B Metallo-β-lactamase	negative	blaNDM-13, blaCTX-M-14, blaTEM-1B	aac(3)-IV, aph(3')-Ia, aph(4)-Ia, aadA2	sul2	dfrA12	parC		tet(B)	mph(A)				fosA3	O101H9	744		IncFIB	IncFII			IncI1-I								2S	>=32R	>=128R	>=64R	>=64R	>=64R	>=32R	>=64R
ECO30	2021	63	Male	Rehabilitation	Hypertension, Stroke	Urinary tract infection, Pneumonia	Yes	Yes	Yes	Urine	Cure	SAMN37576092		negative	blaNDM-5, blaOXA-10, blaTEM-1B	aac(3)-IId, aph(3')-Ia, aph(3'')-Ib, aph(6)-Id, aadA2b, aadA22, aadA1, aadA24, bleO	sul2, sul3	dfrA14		qnrS1	tet(A)		lnu(F)		ARR-2		O132H28	297		IncFIB	IncFII	IncX1				IncHI2						<=1S	>=32R	>=128R	>=64R	>=64R	>=64R	>=32R	>=64R
ECO31	2021	80	Male	Respiratory	Lung cancer	Pneumonia	No	No	No	Sputum	Given up	SAMN37576093		negative	blaNDM-5, blaCTX-M-65, blaTEM-1B	aac(3)-IV, aph(4)-Ia	sul2		parC		tet(B)						H25	156				IncX3					IncY					>=64R	>=32R	>=128R	>=64R	>=64R	>=64R	>=32R	>=64R
ECO32	2022	73	Male	Oncology	Gastric cancer	Pneumonia	No	Yes	No	Sputum	Cure	SAMN37576094		negative	blaNDM-5, blaCTX-M-55	aph(3'')-Ib, aph(6)-Id	sul2		parC		tet(A)						H9	410				IncX3								p0111		>=64R	>=32R	>=128R	>=64R	>=64R	>=64R	>=32R	>=64R
ECO33	2022	59	Female	Neurosurgery	No significant medical history	Pneumonia	Yes	No	No	Sputum	Cure	SAMN37576095		negative	blaNDM-5, blaTEM-207, blaTEM-1B, blaTEM-30	aac(3)-IId, aph(3')-Ia, aadA1	sul1, sul2, sul3	dfrA12	parC	qnrD1, aacA4cr	tet(A), tet(M)		lnu(F)				H25	5229		IncFIB	IncFII	IncX1			IncQ1							<=1S	>=32R	>=128R	>=64R	>=64R	>=64R	16R	>=64R
[truncated: 11 more columns]

## Sheet: virulence factors
Isolate	csgA	fimH	hlyE	hlyF	hra	iha	iroN	irp2	iss	iucC	iutA	kpsE	kpsMII_K5	kpsMIII_K96	kpsMIII_K98	lpfA	mchF	mrkA	nlpI	ompT	papA_F19	papA_F43	papC	senB	sfaD	shiA	shiB	sitA	terC	tia	traJ	traT	tsh	usp	yehA	yehB	yehC	yehD	yfcV	yghJ
ECO01	1	1	1					1		1	1	1		1					1							1		1	1			1			1	1	1	1		1
ECO02	1	1	1													1			1										1						1	1	1	1
ECO03	1	1	1		1			1								1			1								1		1						1	1	1	1
ECO04	1	1	1	1			1		1	1	1					1			1	1	1					1		1	1	1	1	1			1	1	1	1
ECO05	1		1					1	1	1	1								1									1	1		1	1			1	1	1	1
ECO06	1	1	1						1							1			1				1			1			1	1					1	1	1	1
ECO07	1	1	1					1				1	1			1			1	1									1			1				1	1	1	1	1
ECO08	1	1	1						1	1	1	1	1			1			1	1							1	1	1			1			1	1	1	1	1	1
ECO09	1		1		1				1										1		1					1			1	1						1	1	1		1
ECO10	1	1	1	1	1		1		1							1			1	1									1						1	1	1	1
ECO11	1		1	1	1		1	1	1	1	1								1	1								1	1		1	1	1			1	1	1		1
ECO12	1		1					1	1										1										1		1	1			1	1	1	1		1
ECO13	1	1	1	1	1				1	1	1					1			1	1			1					1	1		1	1			1	1	1	1		1
ECO14	1	1	1													1			1				1						1	1					1	1	1	1
ECO15	1	1	1									1			1				1				1				1		1					1	1	1	1	1
ECO16	1	1	1						1							1			1								1		1		1	1			1	1	1	1
ECO17	1	1	1	1			1		1	1	1					1			1	1								1	1		1	1			1	1	1	1		1
ECO18	1	1	1		1											1			1				1						1						1	1	1	1		1
ECO19	1		1		1			1	1	1	1								1									1	1		1	1				1	1	1		1
ECO20	1	1	1	1			1			1	1					1			1	1	1		1			1		1	1	1	1	1			1	1	1	1		1
ECO21	1	1	1	1				1	1	1	1					1			1	1								1	1		1				1	1	1	1
ECO22	1	1	1	1					1	1	1								1	1								1	1		1	1			1	1	1			1
ECO23	1	1	1					1								1			1										1						1	1	1	1
ECO24	1	1				1		1	1	1	1	1	1						1	1		1		1				1	1		1	1		1	1	1	1	1	1	1
ECO25	1	1	1	1	1		1	1	1	1	1					1	1		1	1					1			1	1			1	1		1	1	1	1
ECO26	1	1	1		1														1	1									1			1
ECO27	1	1	1	1			1		1							1			1	1								1	1		1	1			1	1	1	1
ECO28	1	1	1	1			1												1	1								1	1		1	1			1	1	1	1
ECO29	1	1	1	1			1		1	1	1								1	1						1		1	1	1	1	1			1	1	1	1
ECO30	1	1	1	1					1							1			1	1			1					1	1		1	1			1	1	1	1		1
ECO31	1	1	1						1							1			1				1			1			1	1					1	1	1	1
ECO32	1	1	1					1	1							1			1		1					1			1	1					1	1	1	1
ECO33	1	1	1													1		1	1										1		1	1			1	1	1	1

## Sheet: Annual distribution of CREc
Year	2018	2019	2020	2021	2022
Total isolates	725	772	559	1060	1050
CERc	6	17	21	19	7
